# Supplementary material
Source: Springer Nature journal article supplement (https://www.springermedizin.de/resource/supplementary/12916_2012_765_MOESM8_ESM.pdf/9598702)
Supplement: MOESM8 [file 9598702]

**A**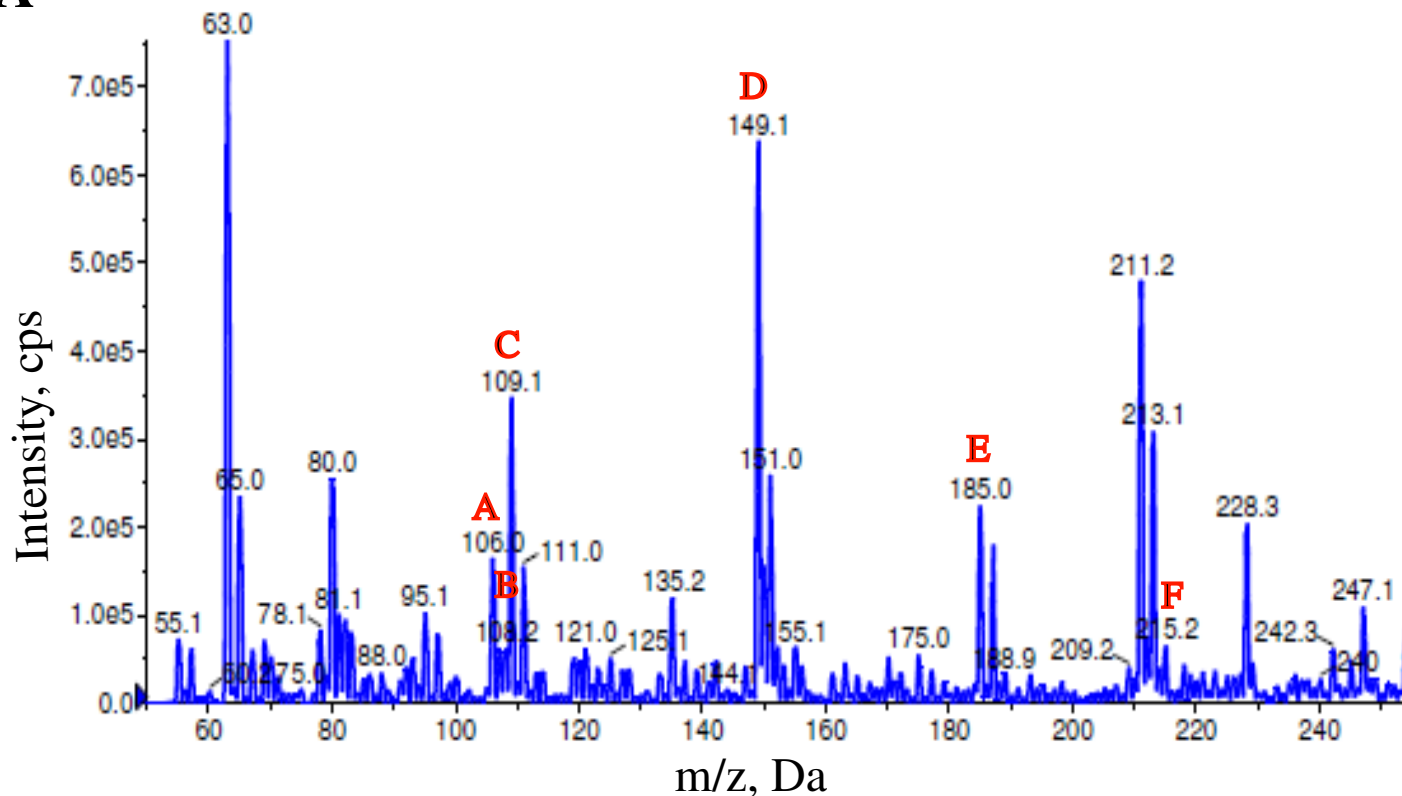**B****A**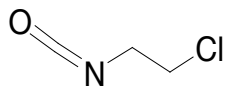

1-chloro-2-isocyanatoethane  
 Chemical Formula:  $C_3H_4ClNO$   
 Exact Mass: 105.00

**B**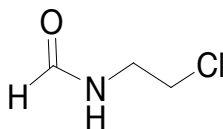

*N*-(2-chloroethyl)formamide  
 Chemical Formula:  $C_3H_6ClNO$   
 Exact Mass: 107.01

**C**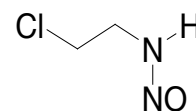

*N*-(2-chloroethyl)nitrous amide  
 Chemical Formula:  $C_2H_5ClN_2O$   
 Exact Mass: 108.01

**D**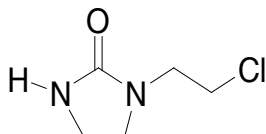

1-(2-chloroethyl)imidazolidin-2-one  
 Chemical Formula:  $C_5H_9ClN_2O$   
 Exact Mass: 148.04

**E**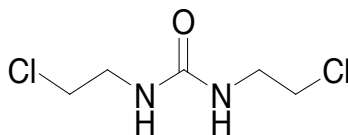

1,3-bis(2-chloroethyl)urea  
 Chemical Formula:  $C_5H_{10}Cl_2N_2O$   
 Exact Mass: 184.02

**F**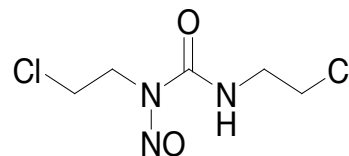

Carmustine  
 Chemical Formula:  $C_5H_9Cl_2N_3O_2$   
 Exact Mass: 213.01
